# Supplementary material for: Tumor cell-imposed iron restriction drives immunosuppressive polarization of tumor-associated macrophages
Source: PubMed Central journal article supplement (PMC8361643; doi:10.1186/s12967-021-03034-7), 2021-08-13

**A**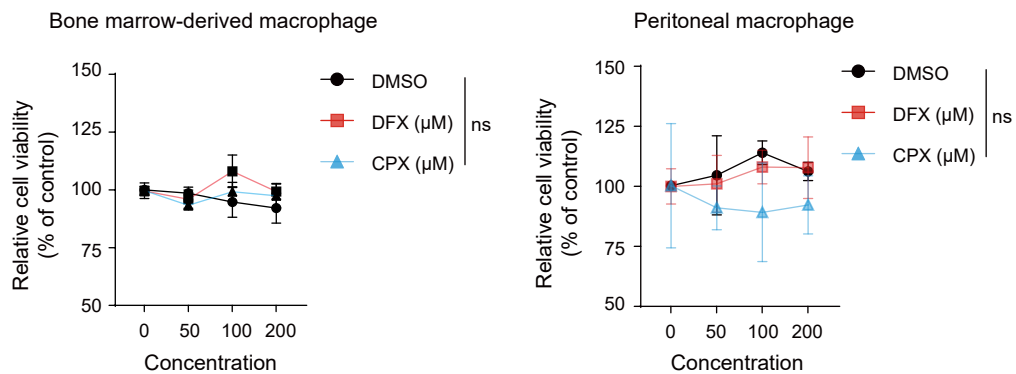**B**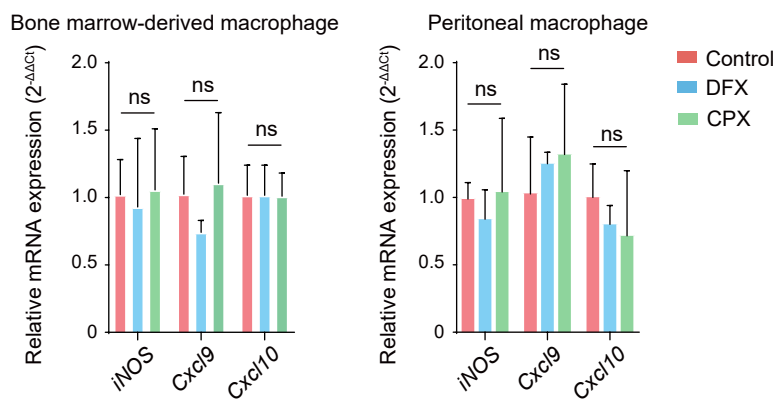**C**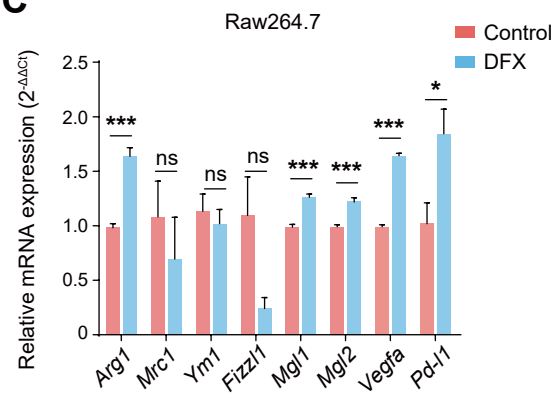**D**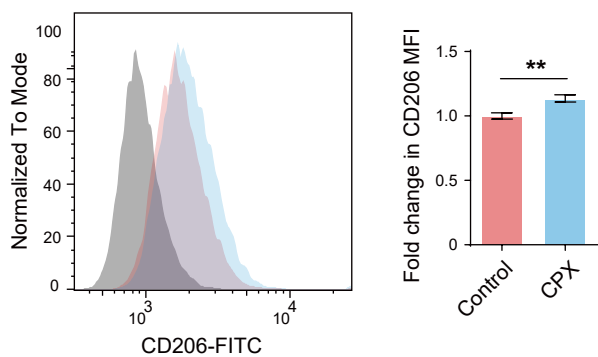**E**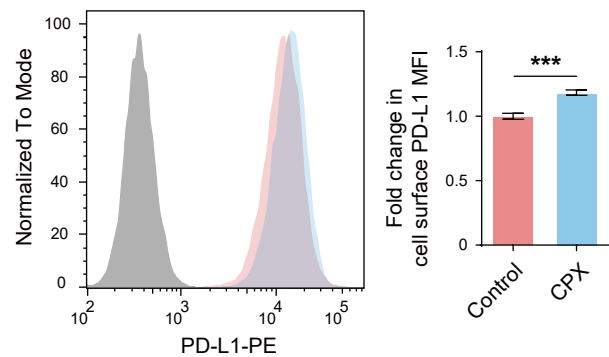**F**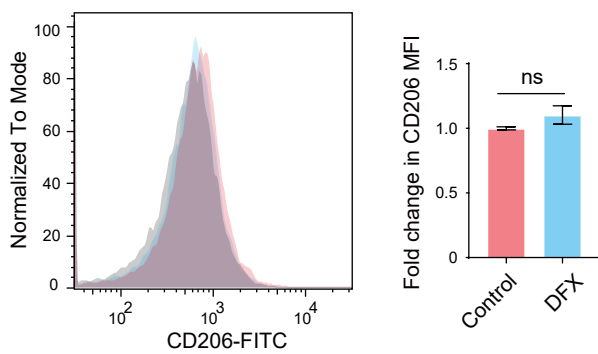**G**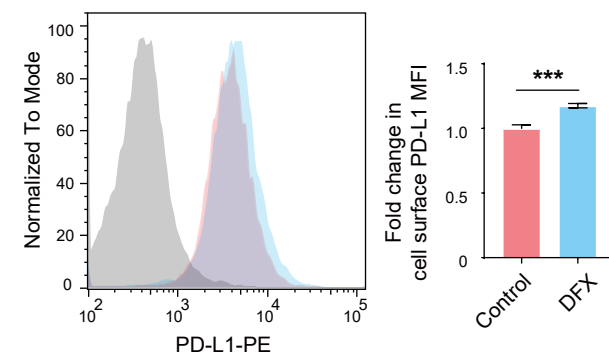

Supplement: 12967_2021_3034_MOESM1_ESM.pdf [file 12967_2021_3034_MOESM1_ESM.pdf]
